# Supplementary material
Source: publisher figshare collection journal article supplement (https://karger.figshare.com/ndownloader/files/13329443)
Supplement: Supplementary file 1 [file 13329443]

**Suppl. Video S1.** We show the three-dimensionality and the overlap of nuclei of squamous cell carcinomas. Observe the nuclear hipercromasia, the interchromatin bridges, and binucleation. Clearing shows a granular and irregularly distributed chromatin giving the appearance of buoyancy.

***Suppl. Video S2.*** Demonstration of perfect clearance by direct mounting (Entellan® media mounting) with the ecological modification of Papanicolaou staining (Eco-Pap-Test).
